# Supplementary material
Source: PubMed Central journal article supplement (PMC8278266)
Supplement: jama-e216986-s004.pdf [file jama-e216986-s004.pdf]

\*Indicates required information. Only first name, last name, and suffix will appear in PubMed.

| <b>*Group Name(s): ATM trial collaborators</b> |                   |                              |                  |                                                |                                          |                                                         |                                                                                            |
|------------------------------------------------|-------------------|------------------------------|------------------|------------------------------------------------|------------------------------------------|---------------------------------------------------------|--------------------------------------------------------------------------------------------|
| <b>*First Name and Middle Initial(s)</b>       | <b>*Last Name</b> | <b>*Suffix (eg, Jr, III)</b> | Academic Degrees | Institution                                    | Location (city, state/province, country) | Role or Contribution, eg, chair, principal investigator | Group (if more than 1 Group listed in the byline) and/or Subgroup (eg, Steering Committee) |
| Kishore                                        | Dasari            |                              | FRCS             | University Hospitals Coventry and Warwickshire |                                          | Principal Investigator                                  |                                                                                            |
| Anna                                           | Chapman           |                              | FRCS             | University Hospitals Coventry and Warwickshire |                                          | Principal Investigator                                  |                                                                                            |
| Michael                                        | Carmont           |                              | FRCS             | The Shrewsbury and Telford Hospital            |                                          | Principal Investigator                                  |                                                                                            |
| Fraser                                         | Harrold           |                              | FRCS             | Ninewells Hospital                             |                                          | Principal Investigator                                  |                                                                                            |
| Jitendra                                       | Mangwani          |                              | FRCS             | University Hospitals of Leicester              |                                          | Principal Investigator                                  |                                                                                            |
| David                                          | Loveday           |                              | FRCS             | Norfolk and Norwich Hospital                   |                                          | Principal Investigator                                  |                                                                                            |
| Chris                                          | Blundell          |                              | FRCS             | Northern General Hospital                      |                                          | Principal Investigator                                  |                                                                                            |
| Carolyn                                        | Chadwick          |                              | FRCS             | Northern General Hospital                      |                                          | Principal Investigator                                  |                                                                                            |
| David                                          | Townshend         |                              | FRCS             | North Tyneside General Hospital                |                                          | Principal Investigator                                  |                                                                                            |
| Kiran                                          | Putchakayala      |                              | FRCS             | Leighton Hospital                              |                                          | Principal Investigator                                  |                                                                                            |
| Jagan                                          | Velpula           |                              | FRCS             | Leighton Hospital                              |                                          | Principal Investigator                                  |                                                                                            |
| Simon                                          | Barnes            |                              | FRCS             | Leighton Hospital                              |                                          | Principal Investigator                                  |                                                                                            |
| Sankalp                                        | Tripiani          |                              | FRCS             | Leighton Hospital                              |                                          | Principal Investigator                                  |                                                                                            |
| Anne-Marie                                     | Hutchison         |                              | PhD              | Morrison Hospital                              |                                          | Principal Investigator                                  |                                                                                            |

## Supplemental Online Content: Nonauthor Collaborators

\*Indicates required information. Only first name, last name, and suffix will appear in PubMed.

| *First Name and Middle Initial(s) | *Last Name | *Suffix (eg, Jr, III) | Academic Degrees | Institution                             | Location (city, state/province, country) | Role or Contribution, eg, chair, principal investigator | Group (if more than 1 Group listed in the byline) and/or Subgroup (eg, Steering Committee) |
|-----------------------------------|------------|-----------------------|------------------|-----------------------------------------|------------------------------------------|---------------------------------------------------------|--------------------------------------------------------------------------------------------|
| Mike                              | Hennessy   |                       | FRCS             | Royal Liverpool and Broadgreen Hospital |                                          | Principal Investigator                                  |                                                                                            |
| Evangelos                         | Maxlous    |                       | FRCS             | Royal Liverpool and Broadgreen Hospital |                                          | Principal Investigator                                  |                                                                                            |
| Gillian                           | Jackson    |                       | FRCS             | Royal Liverpool and Broadgreen Hospital |                                          | Principal Investigator                                  |                                                                                            |
| Ashtin                            | Goorgakant |                       | FRCS             | Royal Liverpool and Broadgreen Hospital |                                          | Principal Investigator                                  |                                                                                            |
| Caroline                          | Lever      |                       | FRCS             | Royal Liverpool and Broadgreen Hospital |                                          | Principal Investigator                                  |                                                                                            |
| Joseph                            | Alsousou   |                       | FRCS             | Royal Liverpool and Broadgreen Hospital |                                          | Principal Investigator                                  |                                                                                            |
| Mark                              | Bloomfield |                       | FRCS             | Arrove Park Hospital                    |                                          |                                                         |                                                                                            |
| Andrew                            | Williams   |                       | FRCS             | Royal Liverpool and Broadgreen Hospital |                                          | Principal Investigator                                  |                                                                                            |
| Andrew                            | Bing       |                       | FRCS             | Robert Jones and Agnes Hunt Hospital    |                                          | Principal Investigator                                  |                                                                                            |
| Sanjeev                           | Madan      |                       | FRCS             | Doncaster and Bassetlaw Hospital        |                                          | Principal Investigator                                  |                                                                                            |
| Andrew                            | Hannah     |                       | FRCS             | Doncaster and Bassetlaw Hospital        |                                          | Principal Investigator                                  |                                                                                            |
| Zain                              | Abiddin    |                       | FRCS             | Doncaster and Bassetlaw Hospital        |                                          | Principal Investigator                                  |                                                                                            |
| Adrian                            | Hughes     |                       | FRCS             | Royal Devon and Exeter                  |                                          |                                                         |                                                                                            |
| Andrew                            | Kelly      |                       | FRCS             | Musgrove Park Hospital                  |                                          |                                                         |                                                                                            |
| Rod                               | Hammett    |                       | FRCS             | Musgrove Park Hospital                  |                                          |                                                         |                                                                                            |
| James                             | Williams   |                       | FRCS             | Musgrove Park Hospital                  |                                          |                                                         |                                                                                            |
| Miriam                            | Day        |                       | FRCS             | Merthyr Tydfil, Prince Charles Hospital |                                          |                                                         |                                                                                            |
| Aureola                           | Tong       |                       | FRCS             | Merthyr Tydfil, Prince Charles Hospital |                                          |                                                         |                                                                                            |

## Supplemental Online Content: Nonauthor Collaborators

\*Indicates required information. Only first name, last name, and suffix will appear in PubMed.

| *First Name and Middle Initial(s) | *Last Name    | *Suffix (eg, Jr, III) | Academic Degrees | Institution                             | Location (city, state/province, country) | Role or Contribution, eg, chair, principal investigator | Group (if more than 1 Group listed in the byline) and/or Subgroup (eg, Steering Committee) |
|-----------------------------------|---------------|-----------------------|------------------|-----------------------------------------|------------------------------------------|---------------------------------------------------------|--------------------------------------------------------------------------------------------|
| Gafin                             | Morgan        |                       | FRCS             | Merthyr Tydfil, Prince Charles Hospital |                                          |                                                         |                                                                                            |
| Gavin                             | Clague        |                       | FRCS             | Merthyr Tydfil, Prince Charles Hospital |                                          |                                                         |                                                                                            |
| Callum                            | Clark         |                       | FRCS             | Wexham Park Hospital                    |                                          |                                                         |                                                                                            |
| Ngwe                              | Phyo          |                       | FRCS             | Wexham Park Hospital                    |                                          |                                                         |                                                                                            |
| Shelain                           | Patel         |                       | FRCS             | Wexham Park Hospital                    |                                          |                                                         |                                                                                            |
| Naveethan                         | Sivanadarajah |                       | FRCS             | Wexham Park Hospital                    |                                          |                                                         |                                                                                            |
| Anil                              | Prasanna      |                       | FRCS             | Wexham Park Hospital                    |                                          |                                                         |                                                                                            |
| Jasdeep                           | Giddie        |                       | FRCS             | Wexham Park Hospital                    |                                          |                                                         |                                                                                            |
| Ravindran                         | Ranjith       |                       | FRCS             | Basildon Hospita                        |                                          |                                                         |                                                                                            |
| Gurbinder                         | Nandhara      |                       | FRCS             | George Eliot Hospital                   |                                          |                                                         |                                                                                            |
| Vineet                            | Trivedi       |                       | FRCS             | George Eliot Hospital                   |                                          |                                                         |                                                                                            |
| Rajiv                             | Limaye        |                       | FRCS             | North Tees and Hartlepool               |                                          |                                                         |                                                                                            |
| Paul                              | Hodgson       |                       | FRCS             | Cardiff and Vale Orthopaedic Centre     |                                          |                                                         |                                                                                            |
| Abhijit                           | Guha          |                       | FRCS             | Alexandra Hospital                      |                                          |                                                         |                                                                                            |
| Manoj                             | Sivan         |                       | FRCS             | Wharfedale Hospital                     |                                          |                                                         |                                                                                            |
| Rajarshi                          | Bhattacharya  |                       | FRCS             | Imperial College London                 |                                          |                                                         |                                                                                            |
| Dimitri                           | Amiras        |                       | FRCS             | Imperial College London                 |                                          |                                                         |                                                                                            |
