# Supplementary material
Source: PubMed Central journal article supplement (PMC8278266)
Supplement: jama-e216986-s005.pdf [file jama-e216986-s005.pdf]

## **Data Sharing Statement**

**Data**

**Data available:** No
